# Supplementary material for: Nanoceria Prevents Glucose-Induced Protein Glycation in Eye Lens Cells
Source: MDPI journal article supplement (doi:10.3390/nano11061473), 2021-06-01
Supplement: s1 [file s1]

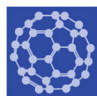

*Supplementary Materials*

# Nanoceria Prevents Glucose-Induced Protein Glycation in Eye Lens Cells

Belal I. Hanafy <sup>1,\*</sup>, Gareth W. V. Cave <sup>1</sup>, Yvonne Barnett <sup>2</sup> and Barbara K. Pierscionek <sup>2,3,\*</sup>

<sup>1</sup> School of Science and Technology, Nottingham Trent University, Clifton Lane, Nottingham NG11 8NS, UK; gareth.cave@ntu.ac.uk

<sup>2</sup> Faculty of Health, Education, Medicine and Social Care and Pharmaceutical Research Group, Medical Technology Research Centre, Anglia Ruskin University, Cambridgeshire CB1 1PT, UK; yvonne.barnett@aru.ac.uk

<sup>3</sup> School of Life Science and Education, Staffordshire University College Road, Stoke on Trent ST4 2DE, UK

\* Correspondence: belal.hanafy2017@my.ntu.ac.uk (B.I.H.); barbara.pierscionek@aru.ac.uk (B.K.P.)

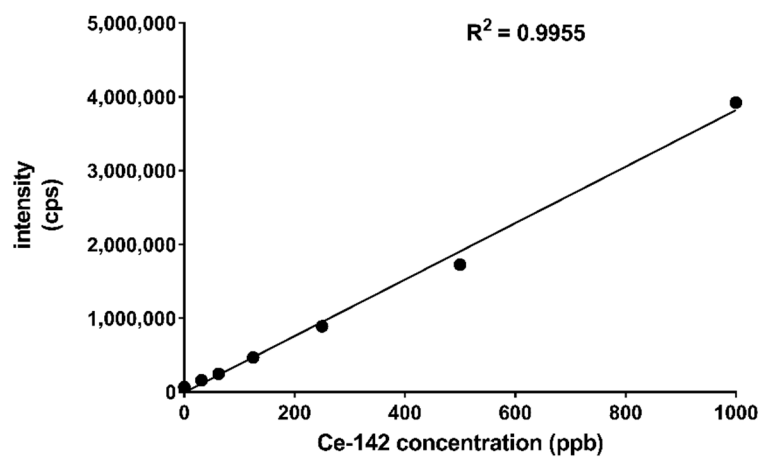

**Figure S1.** Inductively coupled plasma mass spectrometry (ICP-MS) calibration curve (cerium).

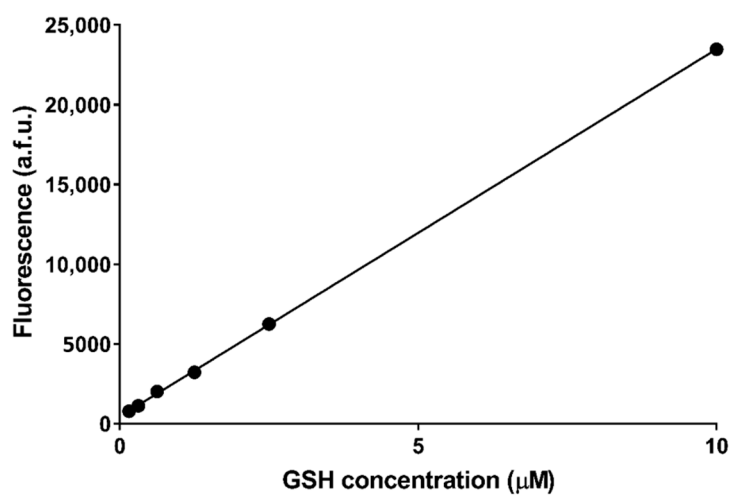

**Figure S2.** Glutathione (GSH) standards calibration curve ( $R^2$  is 0.9999) generated using a spectrofluorometer at ex/em = 490/520 nm.
